# Supplementary material
Source: Springer Nature journal article supplement (https://www.springermedizin.de/resource/supplementary/12936_2012_2457_MOESM2_ESM.pdf/9542718)
Supplement: MOESM2 [file 9542718]

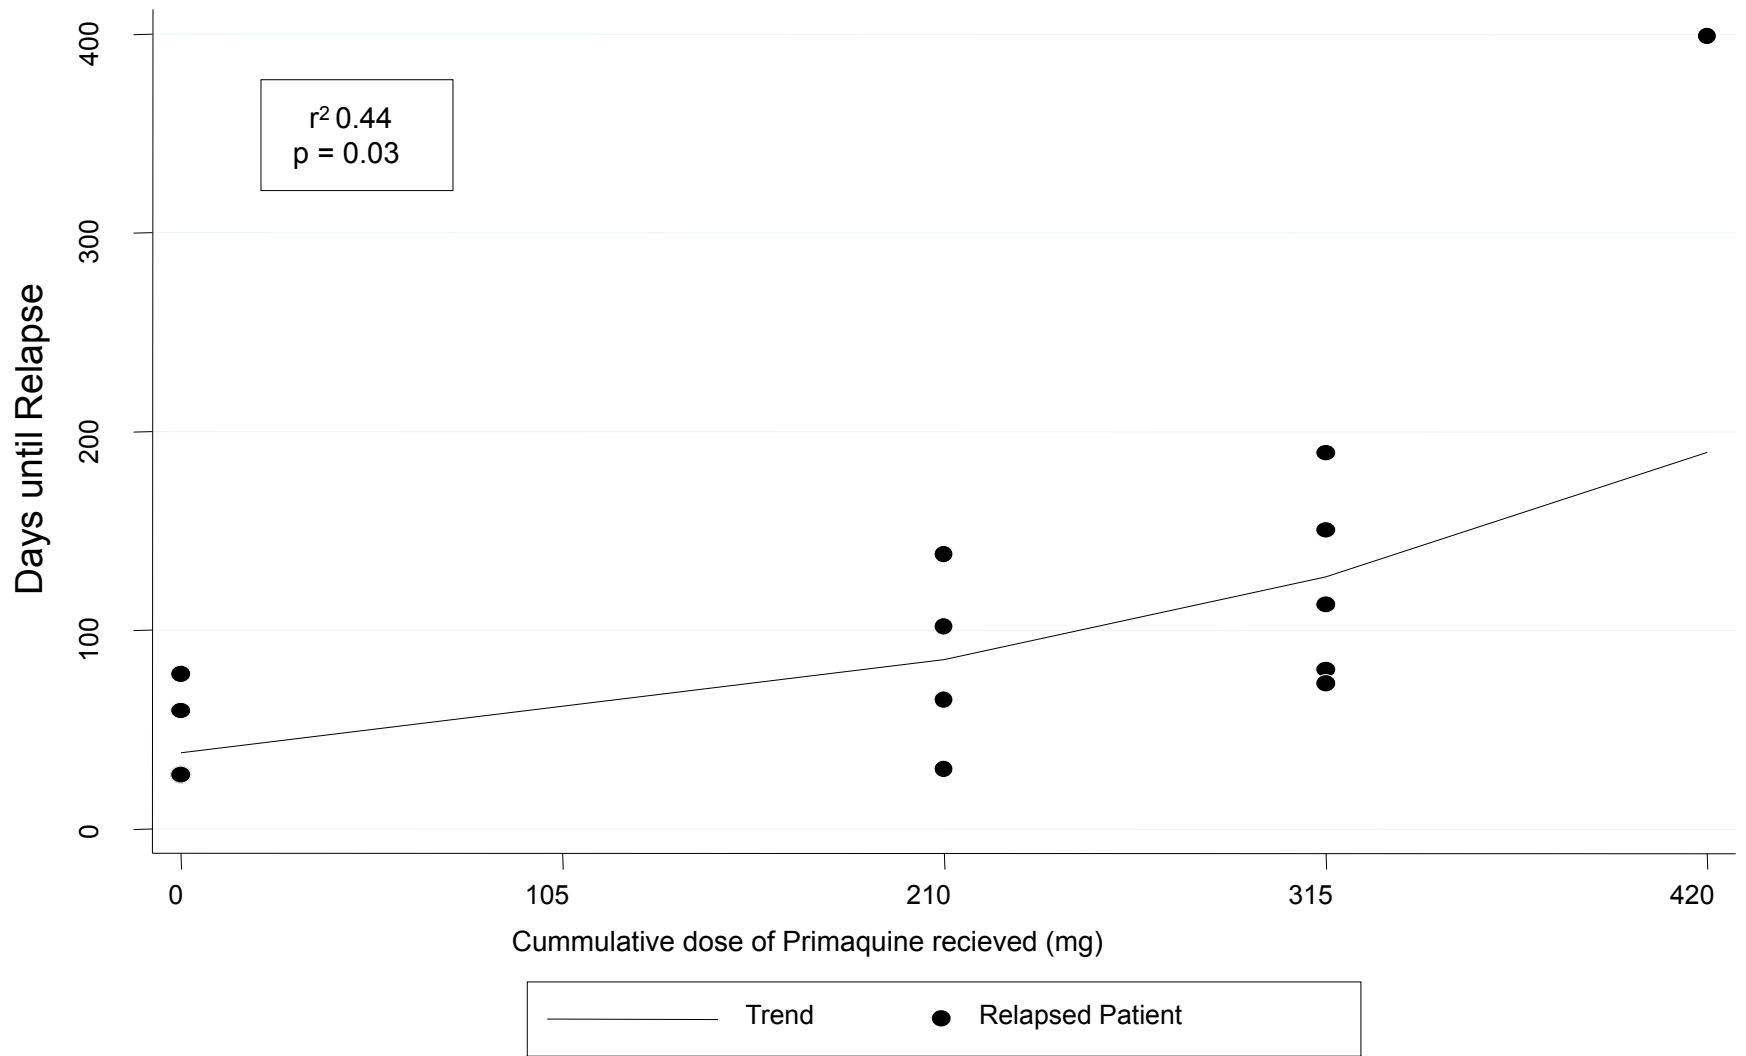

\*Relapsed infection with unknown primaquine doses - not shown on chart. Time to relapse 50, 51, 60, 77, 87, 108, 164 days.

Equivalent dosages – 210mg = 15mg once daily for 2 weeks, 315mg = 22.5mg once daily for 2weeks, 420mg = 30mg once daily for 2 weeks
